# Supplementary material for: Premature mortality due to four main non-communicable diseases and suicide in Brazil and its states from 1990 to 2019: A Global Burden of Disease Study
Source: PubMed Central journal article supplement (PMC9009436; doi:10.1590/0037-8682-0328-2021), 2022-01-28
Supplement: 1678-9849-rsbmt-55-s01-e0328-2021-supp3.pdf [file 1678-9849-rsbmt-55-s01-e0328-2021-supp3.pdf]

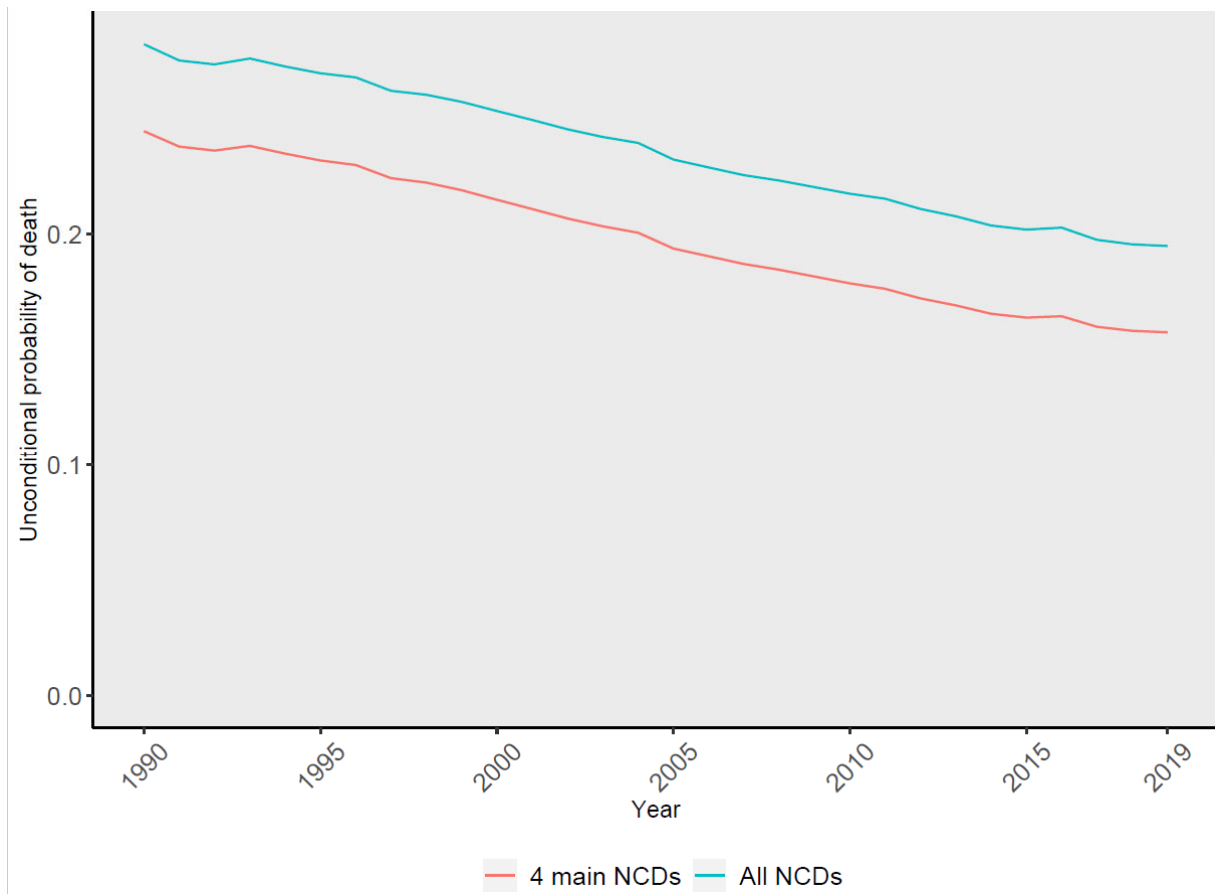

**Supplementary Figure 2:** Comparison of trends in the unconditional probability of death from 30 to 69 years of age for the four main non-communicable diseases (red line) and all non-communicable diseases (blue line).
