# Supplementary material for: Premature mortality due to four main non-communicable diseases and suicide in Brazil and its states from 1990 to 2019: A Global Burden of Disease Study
Source: PubMed Central journal article supplement (PMC9009436; doi:10.1590/0037-8682-0328-2021), 2022-01-28
Supplement: 1678-9849-rsbmt-55-s01-e0328-2021-supp4.pdf [file 1678-9849-rsbmt-55-s01-e0328-2021-supp4.pdf]

**Supplementary Table 2:** Estimated rates and percent declines in age-standardized mortality and the unconditional probability of death from the four main NCDs, ages 30-69, to be achieved based on the assumption that future declines will be equal to those in these metrics over two periods – from 2010 to 2019 and from 2015 to 2019. Brazil.

|               |             | Age-standardized mortality      |                       | Unconditional probability of death |                        |
|---------------|-------------|---------------------------------|-----------------------|------------------------------------|------------------------|
|               |             | Assuming the decline in rate of |                       | Assuming the decline at rate of    |                        |
|               |             | 2010-2019                       | 2015-2019             | 2010-2019                          | 2015-2019              |
| Target period | Year        | Rate to be achieved*            |                       | Probability to be achieved         |                        |
|               | 2025        | 294.2 (277.8; 310.9)            | 302.5 (277.9; 328.1)  | 14.5% (13.7; 15.2)                 | 14.8% (13.8; 16.0)     |
|               | 2030        | 272.1 (252.3; 293.3)            | 286.4 (252.2; 324.2)  | 13.5% (12.6; 14.4)                 | 14.1% (12.6; 15.8)     |
| Target period | Target Goal | Decline to be achieved          |                       | Estimated total                    | Decline to be achieved |
| 2010-2025     | 25%         | -20.8% (-25.2; -16.1)           | -18.6% (-25.0; -11.6) | -18.9% (-22.9; -14.6)              | -16.9% (-22.8; -10.4)  |
| 2015-2030     | 33%         | -19.3% (-25.0; -11.6)           | -15.0% (-25.1; -3.4)  | -17.6% (-22.8; -12.0)              | -13.7% (-23.1; -3.1)   |

\*/100,000
